# Supplementary material
Source: PubMed Central journal article supplement (PMC6551589)
Supplement: jsy089_supp.pdf [file jsy089_supp.pdf]

TITLE: DSEM Sleep & Sedentary;

Data:

File is Data.dat;

Variable:

Names ARE

ID

Sedentary

Sleep;

Cluster = ID; !Specifies the person ID

Usevar = Sleep Sedentary;

Lagged = Sedentary(1) Sleep(1) ; !lags sedentary & sleep by 1

Missing = all(-9999);

Analysis:

TYPE = twolevel Random;

Estimator = Bayes; !DSEM requires Bayes

Proc= 2;

Bits= (5000);

bseed = 526;

thin = 10;

Model :

%WITHIN%

!Random Slopes;

SED\_Lag | Sedentary ON Sedentary&1; !autoregressive path for sedentary

SED\_Sle | Sedentary ON Sleep&1; !Crosslagged predicting sedentary

SLE\_Sed | Sleep ON Sedentary; !Crosslagged predicting sleep

SLE\_Lag | Sleep ON Sleep&1; !autoregressive path for sleep

%Between% ! Allowing for correlated error terms

Sedentary WITH Sleep;

Sed\_Lag WITH SED\_sle SLE\_sed SLE\_lag Sedentary Sleep;

SED\_sle WITH SLE\_sed SLE\_lag Sedentary Sleep;

SLE\_sed WITH SLE\_lag Sedentary Sleep;

SLE\_lag WITH Sedentary Sleep;

OUTPUT: STDYX; !Standardized output to compare cross lagged effects
